# Supplementary material for: Regulatory integration and transregional corporations’ new investments under ex-ante regulation and ex-post liability: A real option perspective
Source: Research Square preprint supplement (doi:10.21203/rs.3.rs-6918023/v1), 2025-07-01
Supplement: Supplementary file 1 [file ae6ced07b522dfd7330b0a1a.docx]

**Supplementary Information of**

**Regulatory integration and transregional corporations’ new investments under ex-ante regulation and ex-post liability: A real option perspective**

For journal:*Journal of Regulatory Economics*

Mengshuai Zhua,b, *, Kutay Cingizb, Jifang Liu a, *, Justus Wesselerb

1. Agricultural Information Institute, Chinese Academy of Agricultural Sciences, 10081 Beijing, China
2. Agricultural Economics and Rural Policy Group, Wageningen University, 6706KN Wageningen, The Netherlands

Corresponding author:

Mengshuai Zhu, Email: [zhumengshuai@caas.cn](mailto:zhumengshuai@caas.cn); [mengshuai.zhu@wur.nl](mailto:mengshuai.zhu@wur.nl).

Jifang Liu, Email: [liujifang@caas.cn](mailto:liujifang@caas.cn)

Address: No. 12 Zhongguancun South Street, Haidian, 10081 Beijing, China.

**A The Basic Model**

Through Purnhagen and Wesseler (2019), in the research phase, the firm should invest in research cost at the start and annual research costs ; in the approval phase, the firm should invest a sunk approval cost at the start and annual approval costs , with indicating time. The time needed to complete research and approval is unknown, but expectations exist, which are denoted as and for the research and approval phases, respectively. The time length is denoted by the random variables . follows an exponential failure function with , and , where denotes the failure rate. The firm will get a benefit stream , expressed in net-present-value terms, , at time , with ex-post tort liability costs ; the time length is modelled as .

The expected value of investment can be written as follows:

(1)

Assuming and are constant, then:

(2)

**B Calculating the expected value under HR and IR**

(3)

Also, we can perform a similar calculation under IR.

**C Proof of proposition 2**

*Proposition 2.* With OHR, there is a threshold of country quantities for firms to invest in new products with HR.

*Proof.* With as an independent variable and expected values as the dependent variables, let , we could get:

(4)

Then

(5)

So, we could get:

(6)

Now let

(7)

Thus, we have if we suppose . Similarly, if then we get . So there exists a positive number bigger than 1, when , , firms will invest in new products with IR; when , , firms will invest in new products with HR.

**D Proof of inequation (7) and (8)**

When , ; When with , , so we have

(8)

Add these two inequations,

That is”

(9)

So, for inequation (8)

(10)

So, we get:

(11)

**E Scenario analysis**

When facing optional harmonized regulation, our primary interest is in how these parameters affect firms’ optimal choice. For instance, exploring ways for the EU to encourage more fertilizer firms to opt for HR is of interest, as it sets more and stricter rules on environmental safety.

At first, we perform scenario analysis about how the approval phase variables of HR affect firms’ optimal strategy. In our analysis, we consider the average values scenario presented in main document as the base case. We then conduct scenario analysis, exploring with a range from -30% to +30% relative to the base case. The optimal strategies are presented in Table 1. Notably, if all approval variables decrease by 10%, the threshold for choosing HR decreases from five to four, and further decreases to three at -20%, and two at -30%. Conversely, when approval variables increase by 10%, the threshold increases to six, and seven at +20% and nine at +30%. It indicates that the decrease in HR approval phase costs does indeed motivate more firms to opt for HR, while an increase in these costs will result in fewer firms choosing HR.

Table 1 The scenario analysis of the optimal strategy focusing on the approval phase variables (no expansion option)

| Scenario | 1 | 2 | 3 | 4 | 5 | 6 | 7 | 8 | 9 | 10 |
| --- | --- | --- | --- | --- | --- | --- | --- | --- | --- | --- |
| Base+30% | IR | IR | IR | IR | IR | IR | IR | IR | HR* | HR |
| Base+20% | IR | IR | IR | IR | IR | IR | HR* | HR | HR | HR |
| Base+10% | IR | IR | IR | IR | IR | HR* | HR | HR | HR | HR |
| Base | IR | IR | IR | IR | HR* | HR | HR | HR | HR | HR |
| Base-10% | IR | IR | IR | HR* | HR | HR | HR | HR | HR | HR |
| Base-20% | IR | IR | HR* | HR | HR | HR | HR | HR | HR | HR |
| Base-30% | IR | HR* | HR | HR | HR | HR | HR | HR | HR | HR |
| Note: * marked the threshold value to choose HR. | | | | | | | | | | |

Table 2 presents the optimal strategy when expansion is considered. Comparing these results with those in Table 1, we observe that the thresholds in four scenarios have decreased. Specifically:

In the basic case, the threshold decreases from five to four.

In the -10% case, the threshold decreases from four to three.

In the +10% case, the threshold decreases from six to five.

In the +30% case, the threshold decreases from nine to eight.

These reductions in the threshold values indicate that the presence of an expansion option indeed encourages more firms to opt for HR. However, it is important to note that the thresholds in the other scenarios remain unchanged.

Then we conducted scenario analysis focusing on entry costs, a critical factor for firms’ expansion decisions, varying from -30% to +30%. Table 3 provides the results of this analysis. In scenarios where entry costs are reduced by -10%, -20%, and -30%, the optimal strategy remains the same. This implies that when entry costs are exceptionally low, firms tend to choose expansion consistently. When comparing the base case with the +10% scenario, there is a noticeable threshold change, indicating that a decrease in entry costs may lower the threshold for choosing HR. Additionally, comparing the +10% and +20% scenarios, although the threshold remains unchanged, firms’ behavior may vary. In the +20% scenario, firms operating in five or more regions opt for HR without expansion, whereas they choose expansion in the +10% scenario. In this model, we only consider expansion to one region, but if more regions are considered, the results will be different.

Table 2 The scenario analysis of the optimal strategy focusing on the approval phase variables (with expansion option).

| Scenario | 1 | 2 | 3 | 4 | 5 | 6 | 7 | 8 | 9 | 10 |
| --- | --- | --- | --- | --- | --- | --- | --- | --- | --- | --- |
| Base+30% | (IR,0) | (IR,0) | (IR,0) | (IR,0) | (IR,0) | (IR,0) | (IR,0) | (HR,e)* | (HR,e) | (HR,e) |
| Base+20% | (IR,0) | (IR,0) | (IR,0) | (IR,0) | (IR,0) | (IR,0) | (HR,e)* | (HR,e) | (HR,e) | (HR,e) |
| Base+10% | (IR,0) | (IR,0) | (IR,0) | (IR,0) | (HR,e)* | (HR,e) | (HR,e) | (HR,e) | (HR,e) | (HR,e) |
| Base | (IR,0) | (IR,0) | (IR,0) | (HR,e)* | (HR,e) | (HR,e) | (HR,e) | (HR,e) | (HR,e) | (HR,e) |
| Base-10% | (IR,0) | (IR,0) | (HR,e)* | (HR,e) | (HR,e) | (HR,e) | (HR,e) | (HR,e) | (HR,e) | (HR,e) |
| Base-20% | (IR,0) | (IR,0) | (HR,e)* | (HR,e) | (HR,e) | (HR,e) | (HR,e) | (HR,e) | (HR,e) | (HR,e) |
| Base-30% | (IR,0) | (HR,e)* | (HR,e) | (HR,e) | (HR,e) | (HR,e) | (HR,e) | (HR,e) | (HR,e) | (HR,e) |
| Note: * marked the threshold value to choose HR. | | | | | | | | | | |

Table 3 The scenario analysis of the optimal strategy focusing on the entry cost.

| Scenario | 1 | 2 | 3 | 4 | 5 | 6 | 7 | 8 | 9 | 10 |
| --- | --- | --- | --- | --- | --- | --- | --- | --- | --- | --- |
| Base+30% | (IR,0) | (IR,0) | (IR,0) | (IR,0) | (HR,0)* | (HR,0) | (HR,0) | (HR,0) | (HR,0) | (HR,0) |
| Base+20% | (IR,0) | (IR,0) | (IR,0) | (IR,0) | (HR,0)* | (HR,0) | (HR,0) | (HR,0) | (HR,0) | (HR,0) |
| Base+10% | (IR,0) | (IR,0) | (IR,0) | (IR,0) | (HR,e)* | (HR,e) | (HR,e) | (HR,e) | (HR,e) | (HR,e) |
| Base | (IR,0) | (IR,0) | (IR,0) | (HR,e)* | (HR,e) | (HR,e) | (HR,e) | (HR,e) | (HR,e) | (HR,e) |
| Base-10% | (IR,e) | (IR,e) | (IR,e) | (HR,e)* | (HR,e) | (HR,e) | (HR,e) | (HR,e) | (HR,e) | (HR,e) |
| Base-20% | (IR,e) | (IR,e) | (IR,e) | (HR,e)* | (HR,e) | (HR,e) | (HR,e) | (HR,e) | (HR,e) | (HR,e) |
| Base-30% | (IR,e) | (IR,e) | (IR,e) | (HR,e)* | (HR,e) | (HR,e) | (HR,e) | (HR,e) | (HR,e) | (HR,e) |
| Note: * marked the threshold value to choose HR. | | | | | | | | | | |

**Reference**

Purnhagen, Kai P., and Justus Hh Wesseler. 2019. “Maximum vs Minimum Harmonization: What to Expect from the Institutional and Legal Battles in the EU on Gene Editing Technologies.” *Pest Management Science* 75 (9): 2310–15. https://doi.org/10.1002/ps.5367.
